# Supplementary material for: Co-doped MnFe2O4 nanoparticles: magnetic anisotropy and interparticle interactions
Source: publisher site journal article supplement (doi:10.3762/bjnano.10.86), 2019-04-12
Supplement: Additional file 1 [file 2190-4286-10-86-S1.pdf]

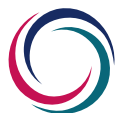

## Supporting Information

for

### **Co-doped $\text{MnFe}_2\text{O}_4$ nanoparticles: magnetic anisotropy and interparticle interactions**

Bagher Aslibeiki, Parviz Kameli, Hadi Salamati, Giorgio Concas,  
Maria Salvador Fernandez, Alessandro Talone, Giuseppe Muscas and Davide Peddis

*Beilstein J. Nanotechnol.* **2019**, *10*, 856–865. [doi:10.3762/bjnano.10.86](https://doi.org/10.3762/bjnano.10.86)

## Additional experimental results

**Figure S1**

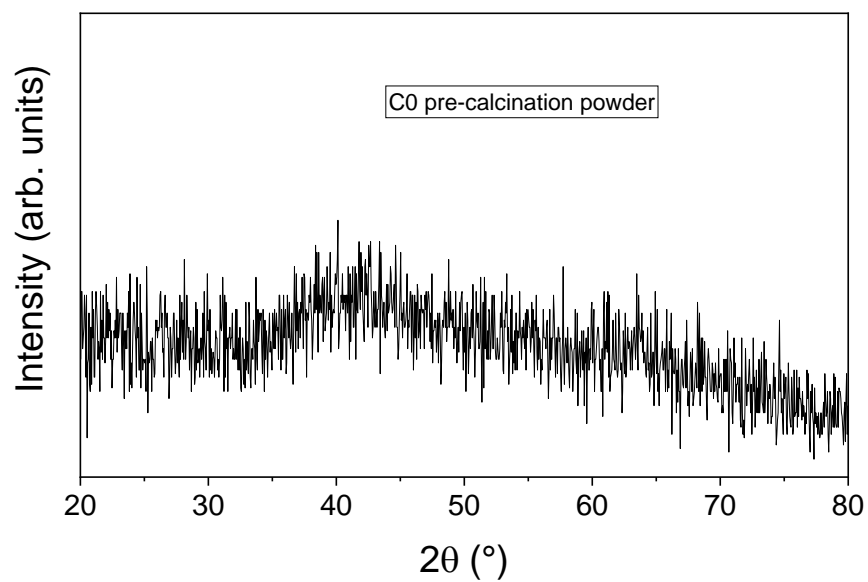

**Figure S1:** The XRD pattern of sample C0 immediately after the milling process is reported as an example. All samples consist of an amorphous powder at this stage of the synthesis.

**Figure S2**

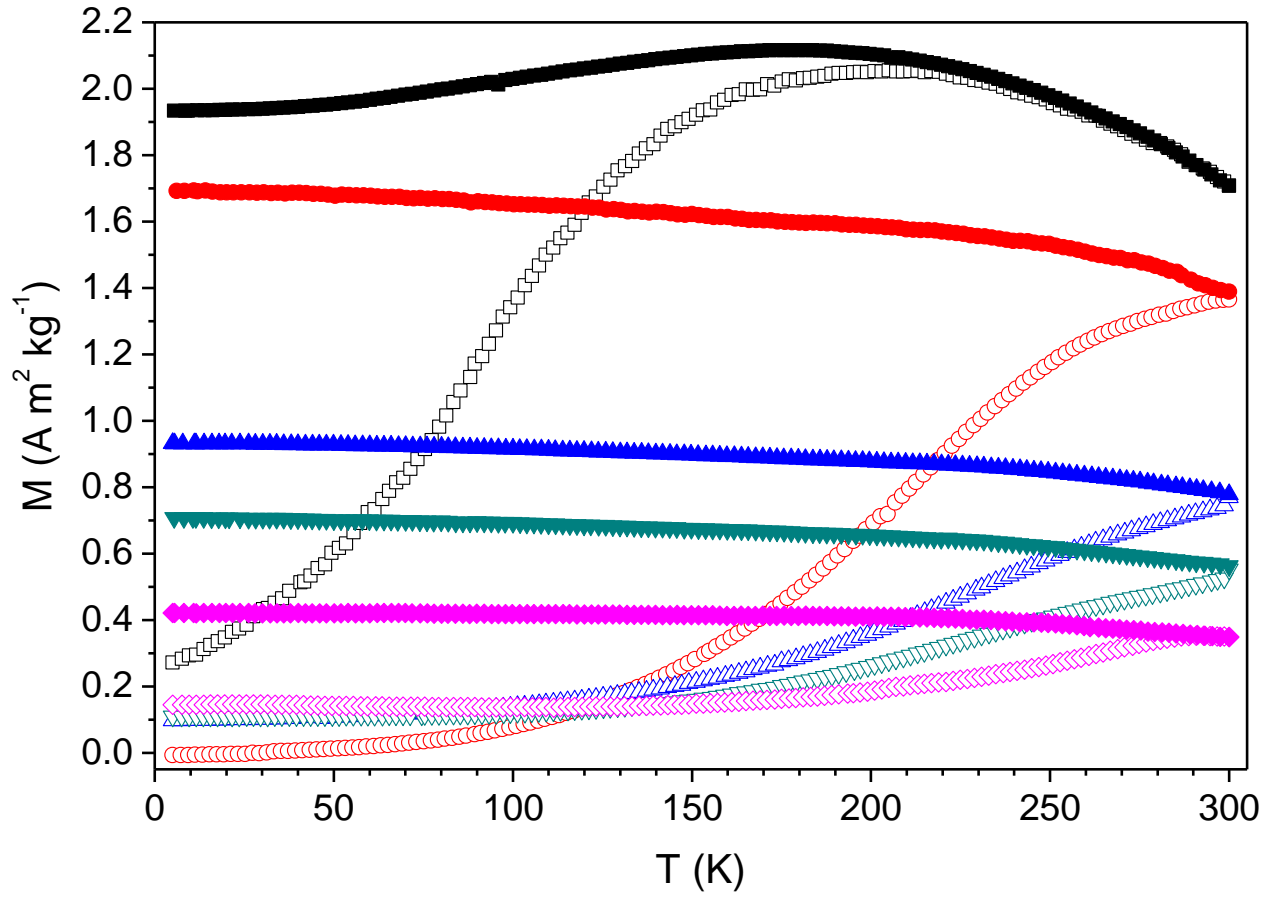

**Figure S2:** ZFC (empty symbols) and FC (full symbols) for sample C0 (black squares), C25 (red circles), C50 blue triangles, C75 (dark cyan reversed triangles), and C100 (magenta diamonds).

**Figure S3**

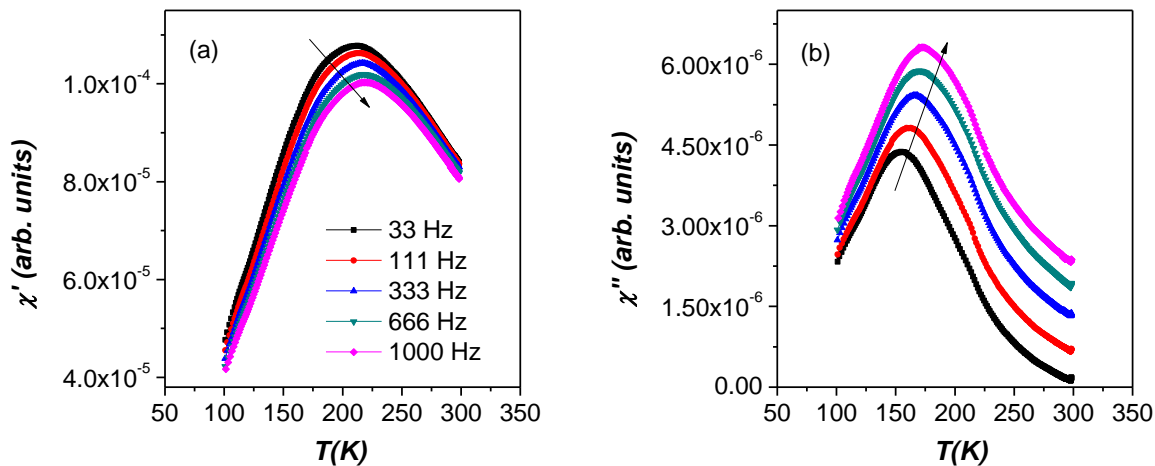

**Figure S3:** AC susceptibility vs temperature measured at different frequencies for sample C0. Panel (a) in-phase component; panel (b) out-of-phase component.

**Figure S4**

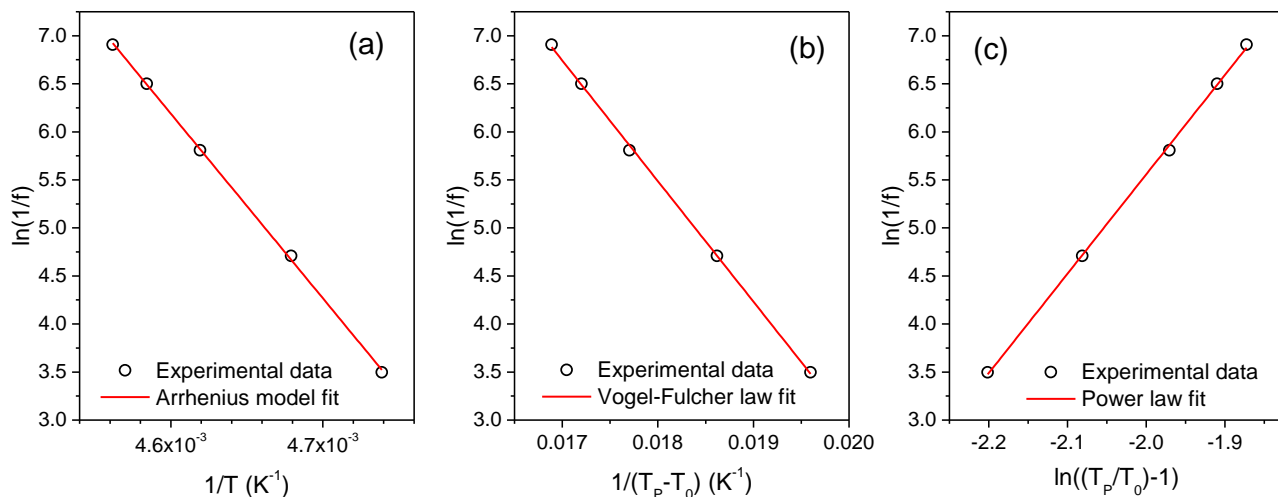

**Figure S4:** Frequency dependence of  $T_p$  in AC curves of sample C0 fitted with the Arrhenius model (a), the Vogel-Fulcher law (b) and the Power law (c).

## Table S1

**Table S1:** Parameter obtained from the AC data fits of sample C0 using the Vogel–Fulcher and the power law.

| Model         | Values       |                       |
|---------------|--------------|-----------------------|
| Vogel–Fulcher | $\tau_0$ (s) | $7(2)\times 10^{-13}$ |
|               | $E/k_B$ (K)  | 1250(20)              |
|               | $T_0$ (K)    | 160(3)                |
| Power law     | $\tau_0$ (s) | $4(1)\times 10^{-12}$ |
|               | $z\nu$       | 10.3(2)               |
|               | $T_g$ (K)    | 190(3)                |
